# Supplementary material for: Developmental and loco-like effects of a swainsonine-induced inhibition ofα-mannosidase in the honey bee,Apis mellifera
Source: PeerJ journal article supplement (doi:10.7717/peerj.3109), 2017-03-16

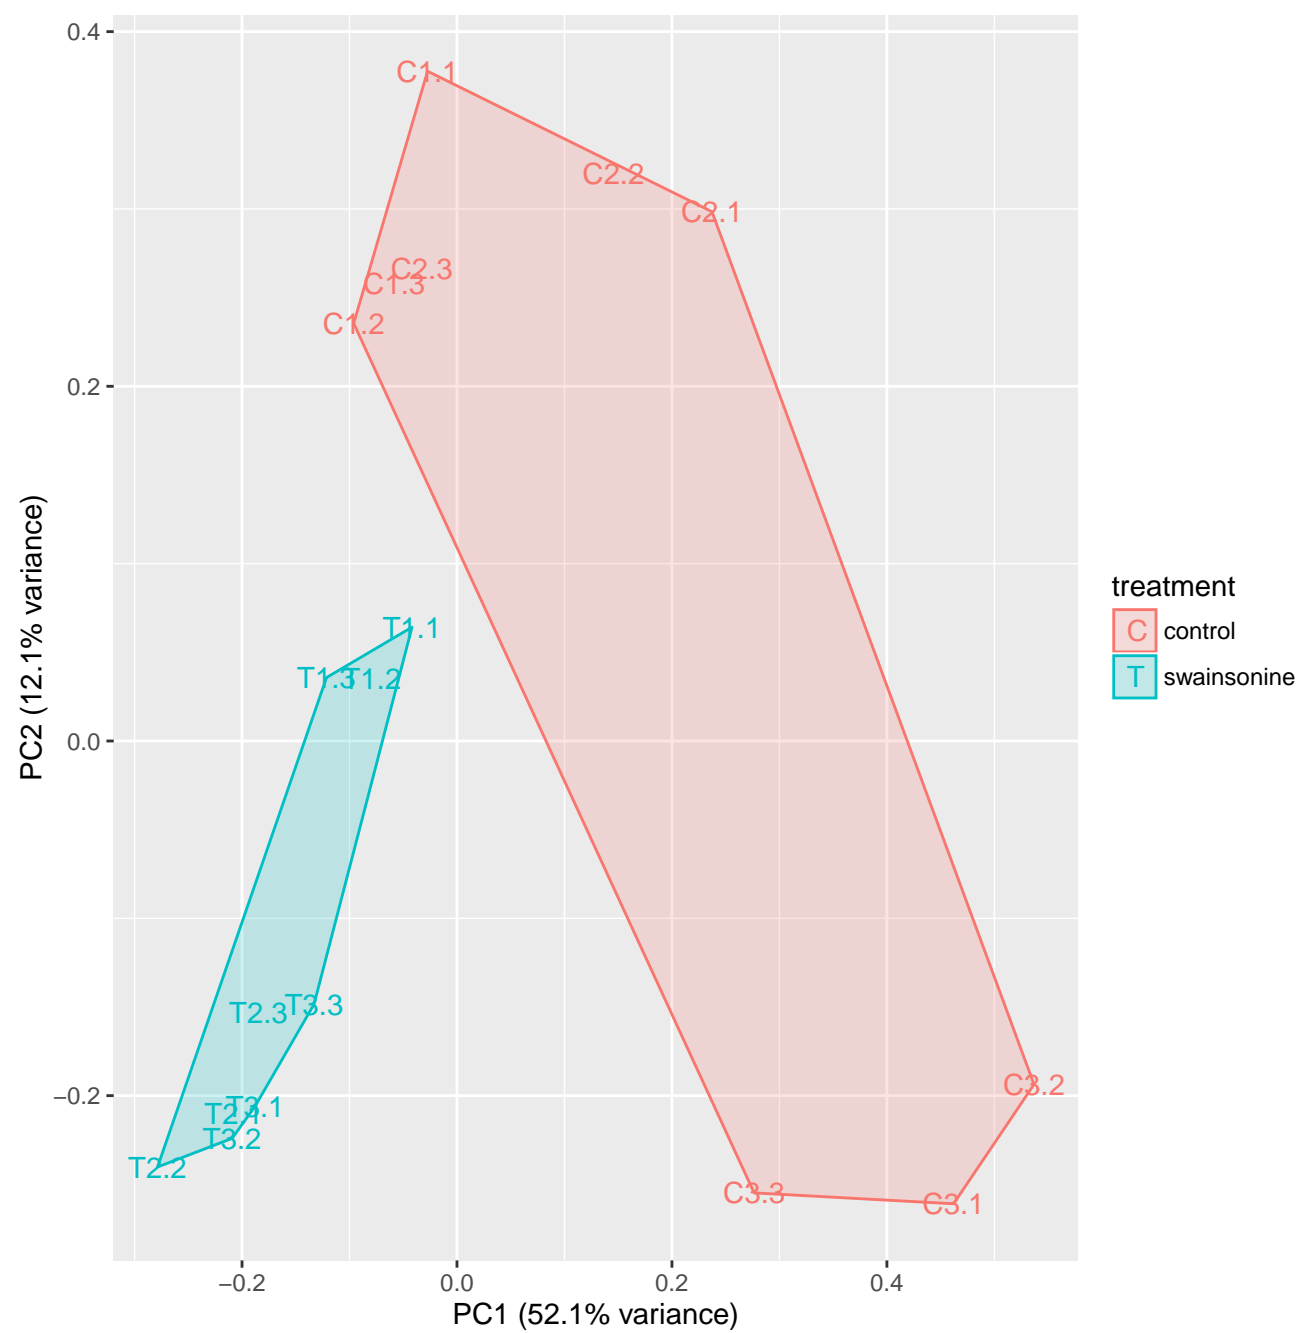

Supplement: Figure_S3.pdf [file Figure_S3.pdf]
